# Supplementary material for: One-step functionalization of mildly and strongly reduced graphene oxide with maleimide: an experimental and theoretical investigation of the Diels–Alder [4+2] cycloaddition reaction
Source: Royal Society of Chemistry journal article supplement (doi:10.1039/d1cp04121e), 2021-12-22
Supplement: d1cp04121e1.pdf [file d1cp04121e1.pdf]

Supplementary Information for

One-step Functionalization of Mildly and Strongly  
Reduced Graphene Oxide with Maleimide: An  
Experimental and Theoretical Investigation of the  
Diels-Alder [4+2] Cycloaddition Reaction

Alfonso Ferretti,<sup>1</sup> Sourab Sinha,<sup>2</sup> Luca Sagresti,<sup>2,3</sup> Esteban Araya-Hermosilla,<sup>4</sup> Mirko Prato,<sup>5</sup>  
Virgilio Mattoli,<sup>4</sup> Andrea Pucci,<sup>5,6</sup> and Giuseppe Brancato<sup>2,3\*</sup>

1. *Università di Pisa, Dipartimento di Ingegneria Civile ed Industriale, Largo Lucio Lazzarino 2, I-56124 Pisa, Italy.*
2. *Scuola Normale Superiore, Piazza dei Cavalieri 7, I-56126 Pisa, Italy and CSGI.*
3. *Istituto Nazionale di Fisica Nucleare (INFN) sezione di Pisa, Largo Bruno Pontecorvo 3, 56127 Pisa, Italy.*
4. *Center for Materials Interfaces, Istituto Italiano di Tecnologia Viale Rinaldo Piaggio 34, 56025 Pontedera, Italy.*
5. *Materials Characterization Facility, Istituto Italiano di Tecnologia, Via Morego 30, 16163 Genoa, Italy.*
6. *Department of Chemistry and Industrial Chemistry, University of Pisa, Via Moruzzi 13, 56124 Pisa, Italy.*
7. *CISUP, Centro per l'Integrazione della Strumentazione dell'Università di Pisa, Lungarno Pacinotti 43, 56126 Pisa, Italy.*

Corresponding authors:

E-mail: [giuseppe.brancato@sns.it](mailto:giuseppe.brancato@sns.it)

# Content

**Figure 1:** Raman spectra of prGO before and after sonication

**Figure 2:** FT-IR spectra of maleimide and maleic anhydride.

**Figure 3:** Top and side views of the product models 1aP, 1bP, and 1cP.

**Figure 4:** Top and side views of the product models 1eP, 1dP, and 1eP.

**Figure 5:** Top and side views of the product models 2P, 3P, 4P, 5P, and 6P.

**Table 1:** Geometrical parameters of the optimized geometry of the maleimide-graphene adducts.

**Figure 6:** Maleimide-graphene geometrical parameters description.

**Figure 7:** Spin density isosurface of the (a,b) 2R and (c,d) 2P vacancy radical systems.

**Table 2:** Transition state geometrical parameters.

**Figure 8:** Side view of the model 1bTS, 2TS, 3TS, 4TS, 8TS, 9TS, and 10TS.

**Table 3:** Reaction and activation enthalpies and free energies.

**Table 4:** Geometrical parameters of the optimized transition states of the maleimide-graphene adducts.

**Figure 9:** Correlation between maleimide-graphene bond length and binding enthalpy.

**Figure 10:** CFF analysis of models 1R and 2R.

**Figure 11:** CFF analysis of models 3R and 4R.

**Figure 12:** CFF analysis of models 5R and 6R.

**Figure 13:** CFF analysis of models 7R and 8R.

**Figure 14:** CFF analysis of models 9R and 10R.

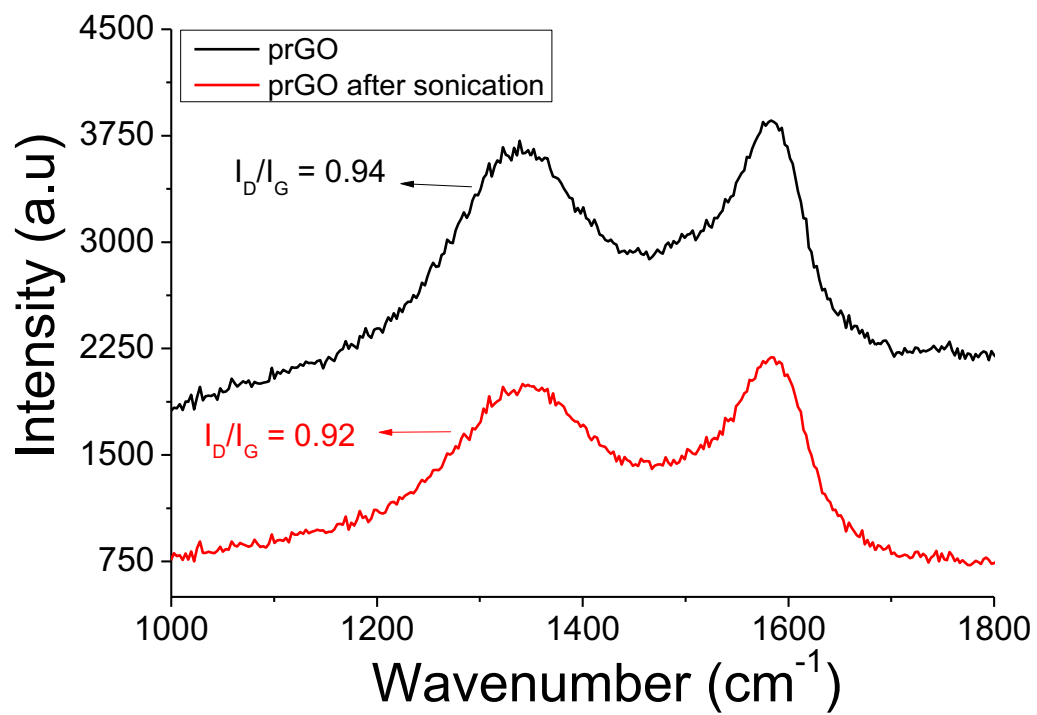

**Figure 1** Raman spectra of prGO before and after sonication.

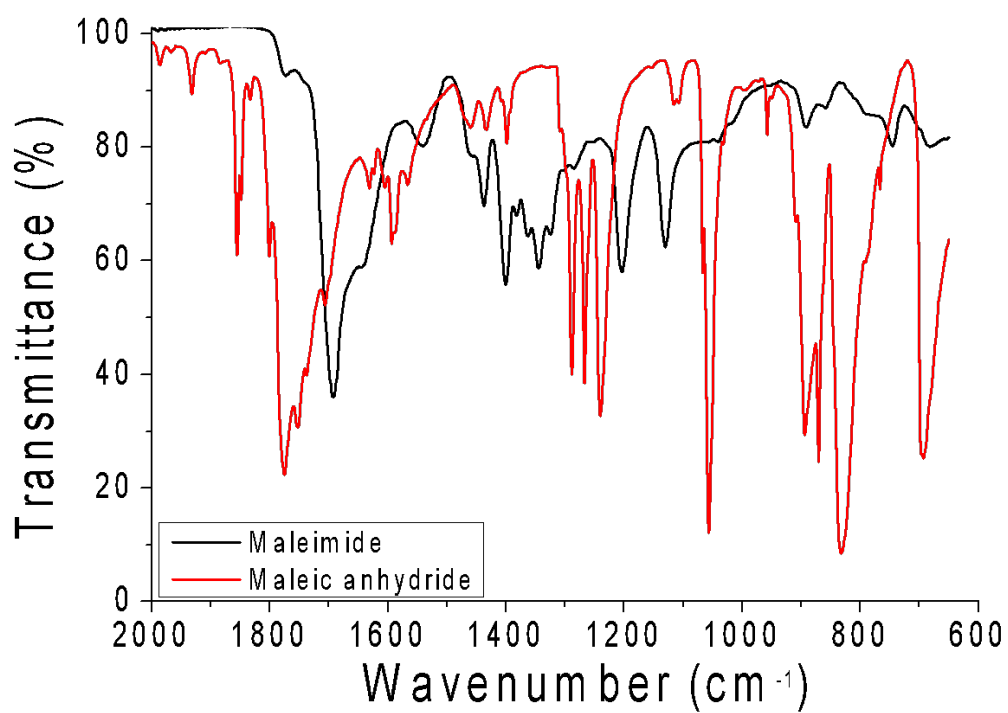

**Figure 2** ATR-FT-IR spectra of the maleimide derivative (black line) and maleic anhydride (red line).

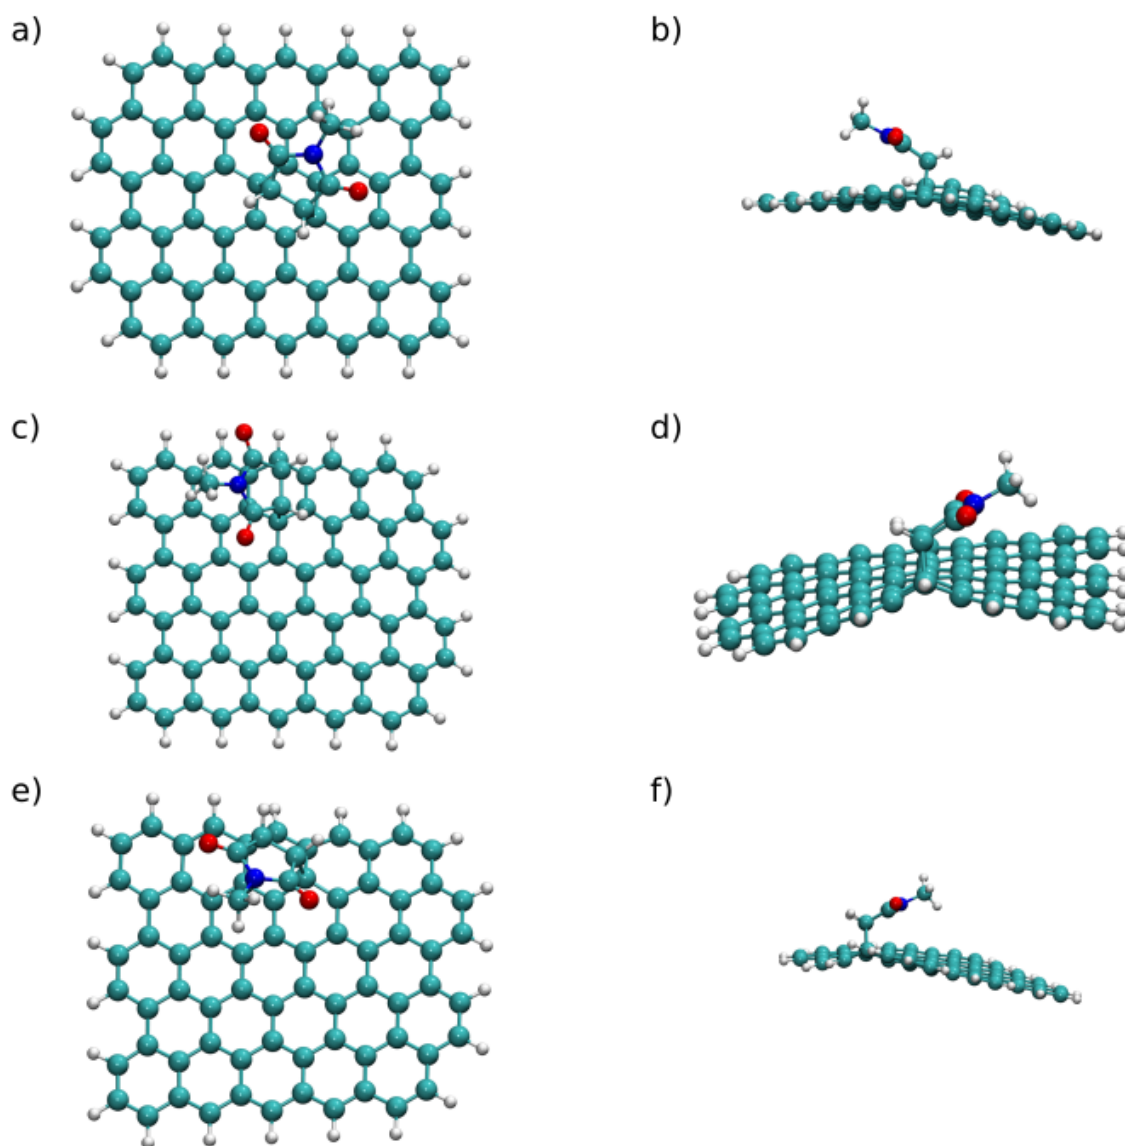

**Figure 3** Top and side view of the model (a, b) 1aP, (c, d) 1bP, and (e, f) 1cP.

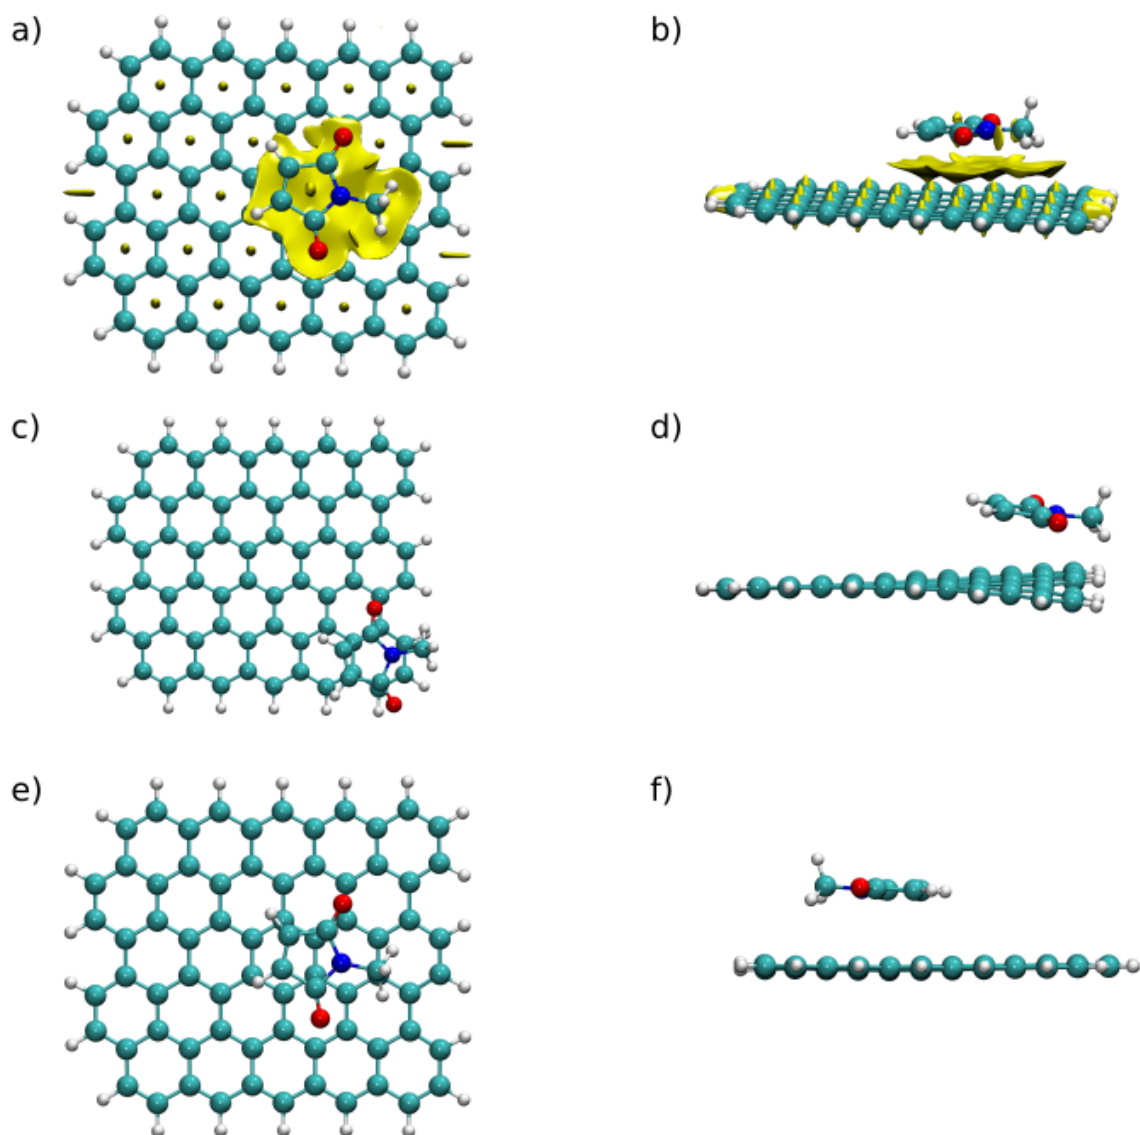

**Figure 4** Top and side views of the non-covalent interaction surface for the model (a, b) 1eP, (c, d) 1dP, and (e, f) 1eP. In a) and b), the non-covalent interaction isosurface is depicted as obtained using the MultiWFN software.

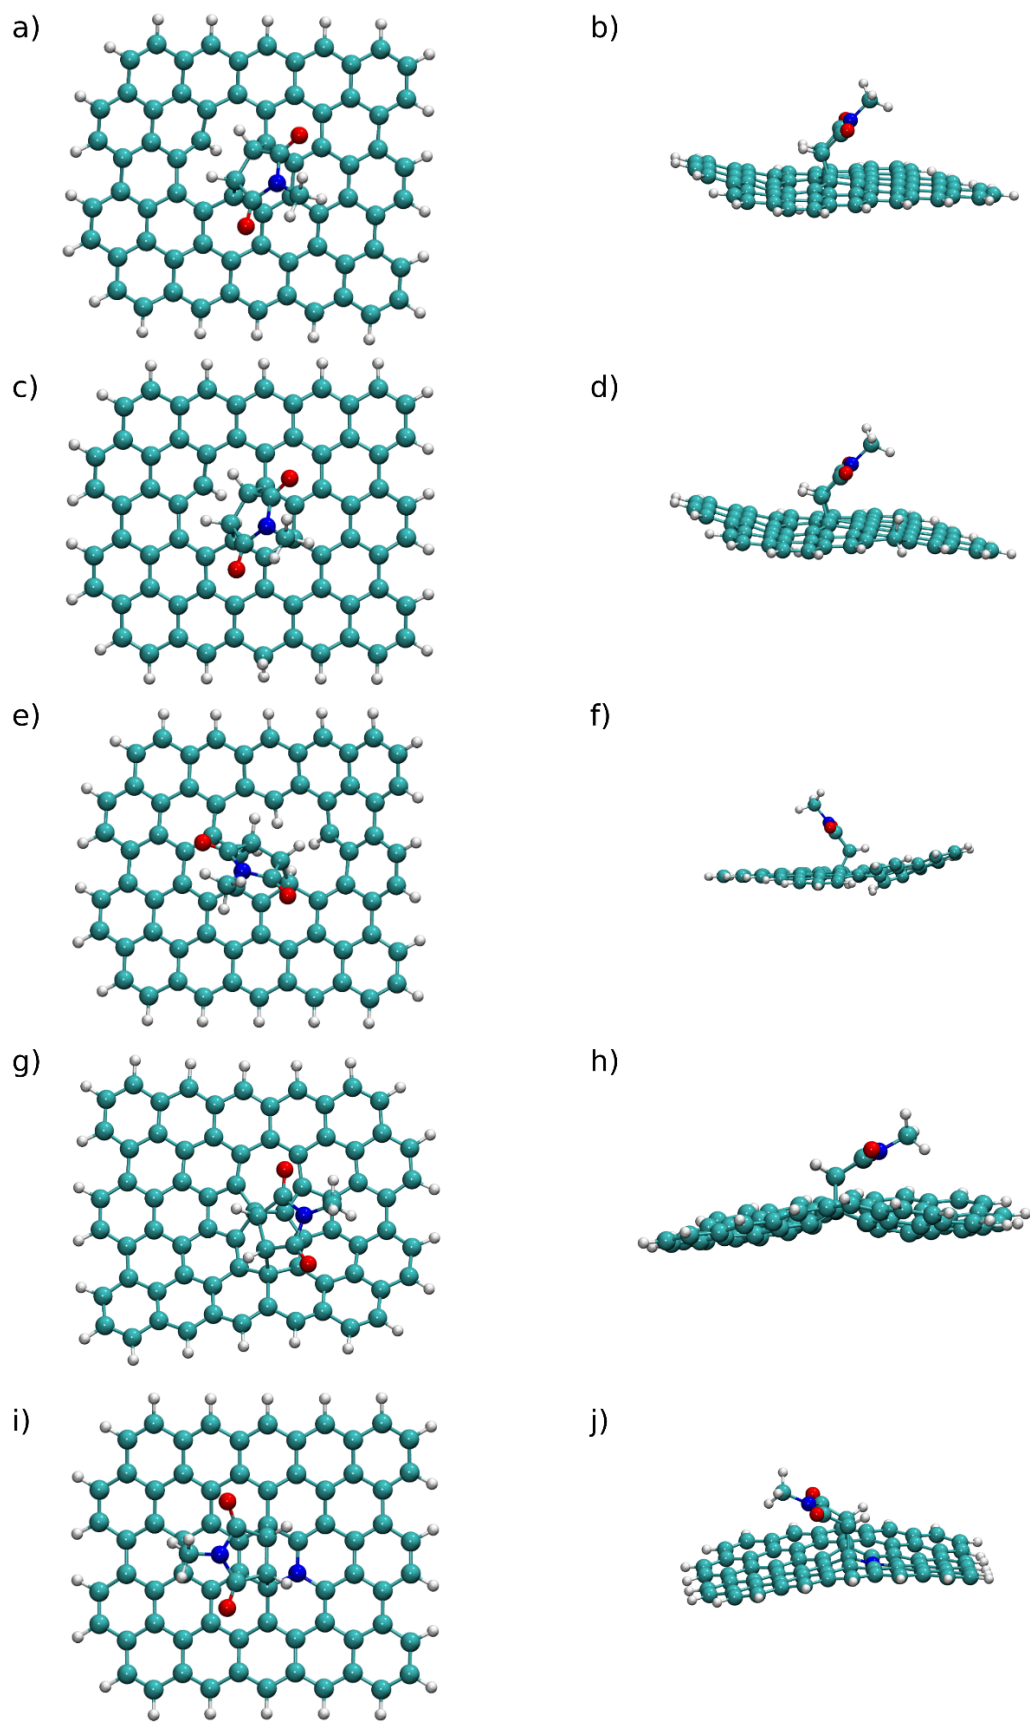

**Figure 5** Top and side views of the model (a, b) 2P, (c, d) 3P, (e, f) 4P, (g, h) 5P, and (i, j) 6P.

**Table 1:** Geometrical parameters of the optimized geometry of the maleimide-graphene adducts. The definition of the geometrical parameters is reported in Figure 5. Angles are in degree, bonds in Å.

| <b>Graphene Product Model</b>            | <b>Dihedral Angle</b> | <b>Maleimide Tilting Angle</b> | <b>Maleimide C=C Bond Length</b> | <b>Maleimide-Graphene Bond Length</b> |
|------------------------------------------|-----------------------|--------------------------------|----------------------------------|---------------------------------------|
| <b>1Pa Central</b>                       | 28.2                  | 25.9                           | 1.53                             | 1.65                                  |
| <b>1Pb External</b>                      | 30.5                  | 26.9                           | 1.54                             | 1.58                                  |
| <b>1Pc Internal</b>                      | 29                    | 26                             | 1.53                             | 1.63                                  |
| <b>1Pd Non-Covalent Border</b>           |                       |                                | 1.33                             | 3.2                                   |
| <b>1Pe Non-Covalent Center</b>           |                       |                                | 1.33                             | 3.19                                  |
| <b>2P Vacancy Radical</b>                | 36.7                  | 53.9                           | 1.53                             | 1.54                                  |
| <b>3P Vacancy External H</b>             | 36.8                  | 56.9                           | 1.53                             | 1.54                                  |
| <b>4P Double Vacancy (585 divacancy)</b> | 37.8                  | 55                             | 1.53                             | 1.56                                  |
| <b>5P Stone Wales Defect</b>             | 28.1                  | 33                             | 1.57                             | 1.6                                   |
| <b>6P Nitrogen Doped</b>                 | 31.6                  | 28.2                           | 1.54                             | 1.6                                   |
| <b>7P Double Epoxy Central</b>           | 30.1                  | 28                             | 1.56                             | 1.59                                  |
| <b>8P Double Epoxy External</b>          | 31.5                  | 31.2                           | 1.55                             | 1.58                                  |
| <b>9P Tetra-Epoxy</b>                    | 33.7                  | 25.3                           | 1.56                             | 1.58                                  |
| <b>10P Double Hydroxyl Epoxy</b>         | 30.8                  | 26.7                           | 1.57                             | 1.58                                  |



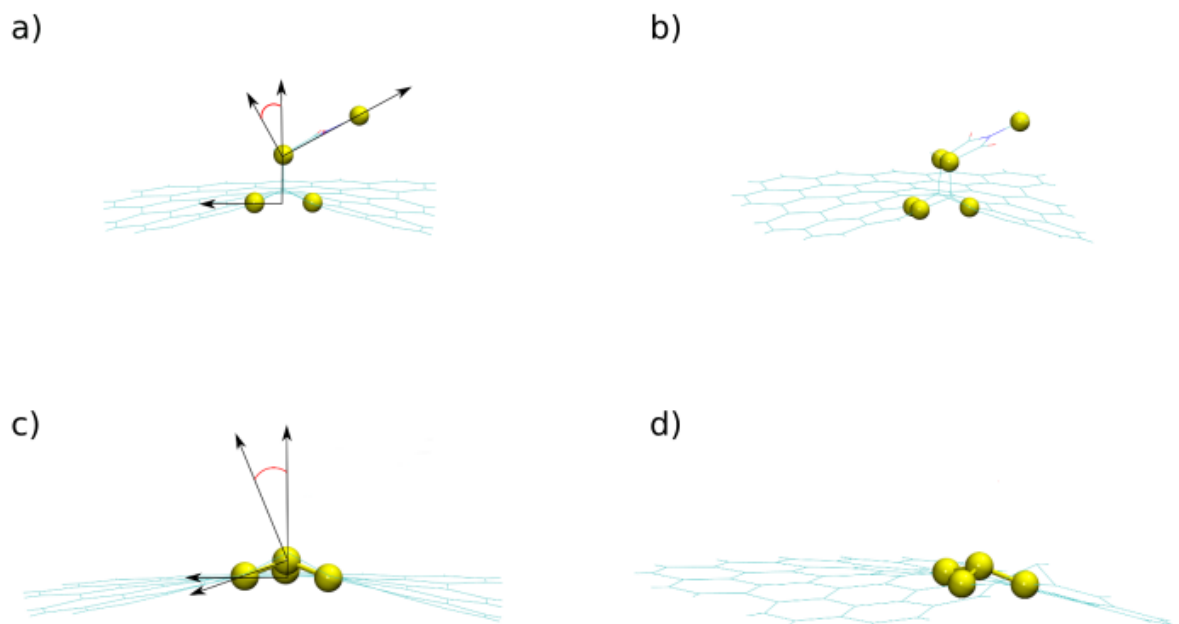

**Figure 6** (a, b) Tilting angle between maleimide molecular axis (i.e., the vector connecting the C=C middle point to the carbon atom belonging to the methyl group) and local graphene plane (i.e., three adjacent carbon atoms are used to identify the local plane). Note that it was considered the complementary angle between maleimide molecular axis and the normal to the local graphene plane. (c, d) Orthogonal and rotated view of the four carbon atom coordinates used to evaluate the local graphene dihedral angle (i.e., improper dihedral), represented in red.

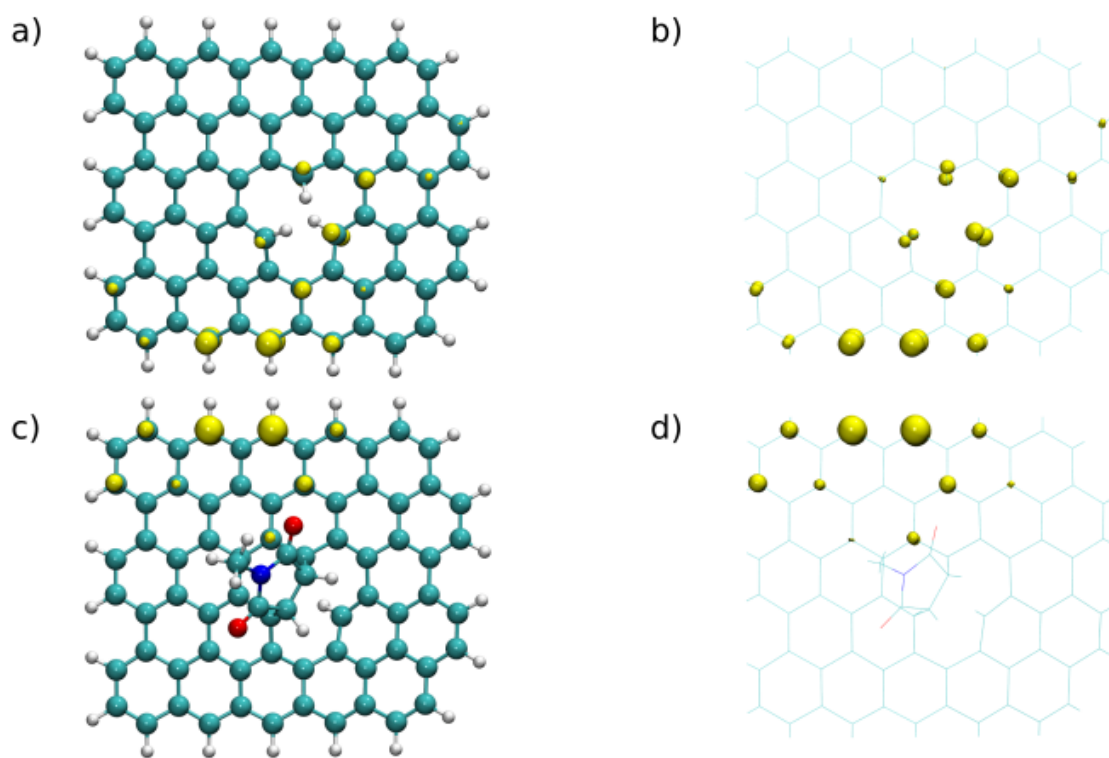

**Figure 7** Spin density isosurface of the (a,b) 2R and (c,d) 2P vacancy radical systems.

a)

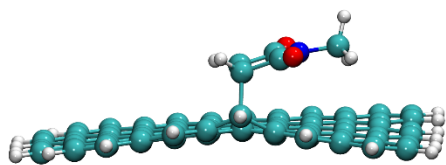

b)

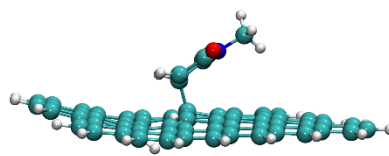

c)

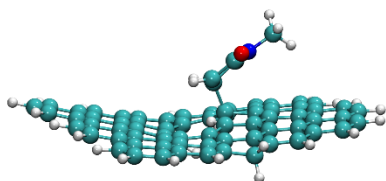

d)

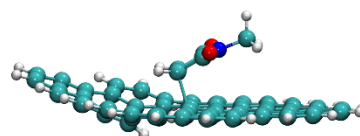

e)

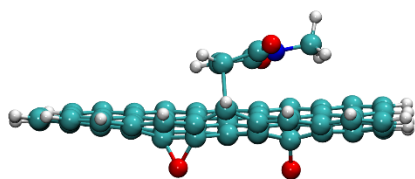

f)

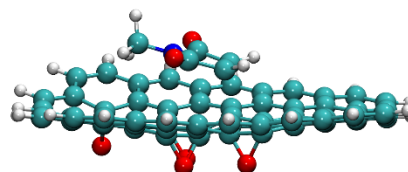

g)

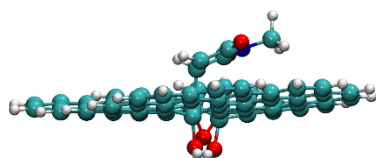

**Figure 8** Side view of the model (a) 1bTS, (b) 2TS, (c) 3TS, (d) 4TS, (e) 8TS, (f) 9TS, and (g) 10TS.

**Table 2:** Solvent (i.e., chloroform and acetonitrile) and temperature effects on the reaction enthalpy ( $\Delta H$ ) of all systems. Thermal effects are evaluated as the difference  $\Delta E(T=323.15K) - \Delta E(T=0K)$  (including zero-point energy). Chloroform and acetonitrile effects are evaluated as the difference  $\Delta E(T=0K, \text{solvent}) - \Delta E(T=0K, \text{gas-phase})$ .

| <b>Model</b>                    | <b>Thermal corr.<br/>(323.15K)</b> | <b>Solvent effects<br/>(chloroform)</b> | <b>Solvent effects<br/>(acetonitrile)</b> |
|---------------------------------|------------------------------------|-----------------------------------------|-------------------------------------------|
| <b>1a Central</b>               | -0.7                               | 5.0                                     |                                           |
| <b>1b External Border</b>       | -0.6                               | 1.0                                     | 1.1                                       |
| <b>1c Internal Border</b>       | -0.5                               | 3.0                                     |                                           |
| <b>1d Non-Covalent Border</b>   | -0.7                               | 1.2                                     |                                           |
| <b>1e Non-Covalent Center</b>   | 0.6                                | 1.3                                     | 1.2                                       |
| <b>2 Vacancy Radical</b>        | -0.6                               | 0.1                                     |                                           |
| <b>3 Vacancy Hext</b>           | -1.0                               | 1.4                                     | 2.3                                       |
| <b>4 Double Vacancy</b>         | -0.4                               | -0.1                                    |                                           |
| <b>5 Stone Wales</b>            | -0.9                               | -1.2                                    |                                           |
| <b>6 Nitrogen Doped</b>         | -1.1                               | 2.7                                     |                                           |
| <b>7a Double Epoxy Central</b>  | -1.1                               | 1.0                                     | 6.0                                       |
| <b>8 Double Epoxy External</b>  | -0.9                               | 0.7                                     |                                           |
| <b>9 Tetra Epoxy</b>            | -1.0                               | 0.9                                     | 1.4                                       |
| <b>10 Double Hydroxyl Epoxy</b> | -0.9                               | 0.8                                     |                                           |

**Table 3:** Reaction enthalpy and Gibbs free energy (in kcal/mol) for all relevant models.

| Reaction         | Activation enthalpy |         | Binding enthalpy |         | Activation free energy |         | Binding free energy |         |
|------------------|---------------------|---------|------------------|---------|------------------------|---------|---------------------|---------|
|                  | Gas                 | Solvent | Gas              | Solvent | Gas                    | Solvent | Gas                 | Solvent |
| <b>1R → 1Pb</b>  | 5.4                 | 4.8     | -12.2            | -11.4   | 21.6                   | 23.8    | 3.4                 | 7.3     |
| <b>1R → 1Pe</b>  |                     |         | -16              | -14.6   |                        |         | -3.4                | -0.1    |
| <b>2R → 2P</b>   | 27.3                | 27.5    | -8               | -8      | 41.8                   | 43.2    | 6.3                 | 8.8     |
| <b>3R → 3P</b>   | 21.3                | 21.7    | -29.3            | -28.1   | 36.7                   | 38.1    | -13.4               | -10.4   |
| <b>4R → 4P</b>   | 16.6                | 17      | -9.1             | -9.2    | 31.5                   | 33      | 5.7                 | 7       |
| <b>7R → 7Pa</b>  |                     |         | -37.9            | -36.9   | 13.4                   | 15.6    | -20.5               | -18.4   |
| <b>8R → 8P</b>   | 4.1                 |         | -15.5            | -15     | 19                     | 16.4    | 0                   | 2.6     |
| <b>9R → 9P</b>   | 3.6                 | 4.9     | -36.1            | -35.3   | 19.3                   | 21.9    | -19.3               | -16.7   |
| <b>10R → 10P</b> | 3.5                 | 3.9     | -28.9            | -28.1   | 19.1                   | 21.6    | -12.7               | -9.8    |

**Table 4:** Geometrical parameters of the optimized transition states of the maleimide-graphene adducts. Angles are in degree, bonds in Å.

| <b>Transition State Model</b>     | <b>Dihedral Angle</b> | <b>Maleimide Tilting Angle</b> | <b>Maleimide C=C Bond Length</b> | <b>Maleimide-Graphene Bond Length</b> |
|-----------------------------------|-----------------------|--------------------------------|----------------------------------|---------------------------------------|
| <b>1bTS External</b>              | 9.5                   | 18.8                           | 1.47                             | 1.66-2.54                             |
| <b>2TS Vacancy Radical</b>        | 10.1                  | 44.9                           | 1.5                              | 1.6-2.27                              |
| <b>3TS Vacancy External H</b>     | 6.3                   | 42.1                           | 1.48                             | 1.64-2.38                             |
| <b>4TS Double Vacancy</b>         | 17.7                  | 32.5                           | 1.42                             | 2.01-2.07                             |
| <b>8TS Double Epoxy External</b>  | 1.6                   | 22.8                           | 1.41                             | 1.96-2.85                             |
| <b>9TS Tetra-Epoxy</b>            | 11.7                  | 21.2                           | 1.4                              | 2.23-2.37                             |
| <b>10TS Double Hydroxyl Epoxy</b> | 9.6                   | 28.5                           | 1.49                             | 1.63-2.57                             |

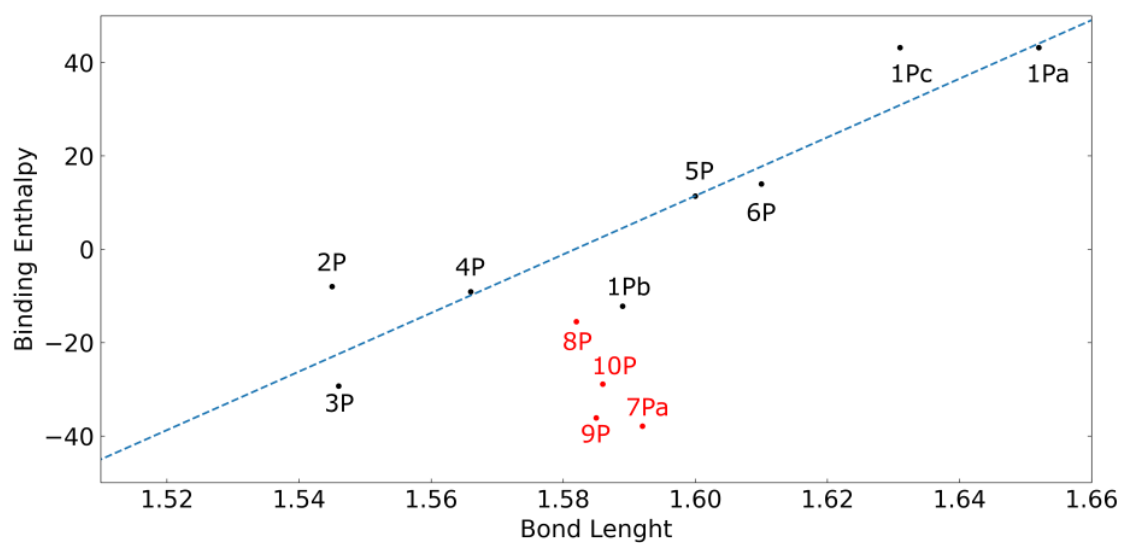

**Figure 9:** Correlation between maleimide-graphene bond length (Table 1) and binding enthalpy. Products obtained from defect-free and defective graphene models (black dots) show a good degree of correlation (linear fitting represented as a dashed line). On the contrary, oxygen-functionalized adduct models (red dots) do not show any apparent correlation.

a)

| 1R Pristine Graphene | Local Nucleophilicity | Local Electrophilicity |
|----------------------|-----------------------|------------------------|
| C1                   | 2.31                  | -1.52                  |
| C2                   | -2.22                 | -2.28                  |
| C3                   | -0.68                 | -0.63                  |
| C4                   | -0.68                 | -0.63                  |
| C5                   | -2.22                 | -2.28                  |
| C6                   | -1.47                 | -1.52                  |
| C7                   | -1.96                 | -1.88                  |
| C8                   | -1.23                 | -1.15                  |
| C9                   | -0.44                 | -0.31                  |
| C10                  | -1.30                 | -1.06                  |
| C11                  | -13.08                | -14.03                 |
| C12                  | -1.65                 | -1.57                  |

b)

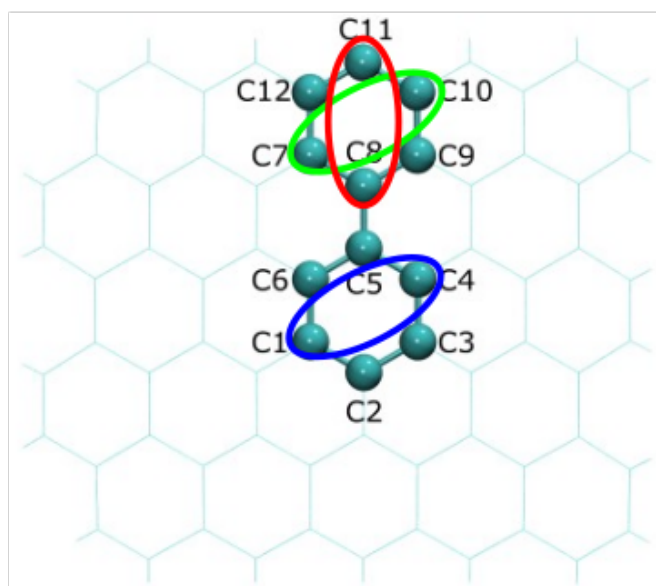

c)

| 2R Vacancy Radical | Local Nucleophilicity | Local Electrophilicity |
|--------------------|-----------------------|------------------------|
| C1                 | -4.24                 | -4.18                  |
| C2                 | -1.25                 | -1.52                  |
| C3                 | -1.42                 | -1.25                  |
| C4                 | 0.00                  | 0.01                   |
| C5                 | -0.74                 | -0.55                  |
| C6                 | -0.27                 | -0.19                  |
| C7                 | -2.10                 | -2.31                  |
| C8                 | -0.74                 | -0.37                  |
| C9                 | -5.92                 | -6.56                  |
| C10                | -0.61                 | -1.11                  |
| C11                | -4.68                 | -4.61                  |
| C12                | -0.66                 | -0.62                  |

d)

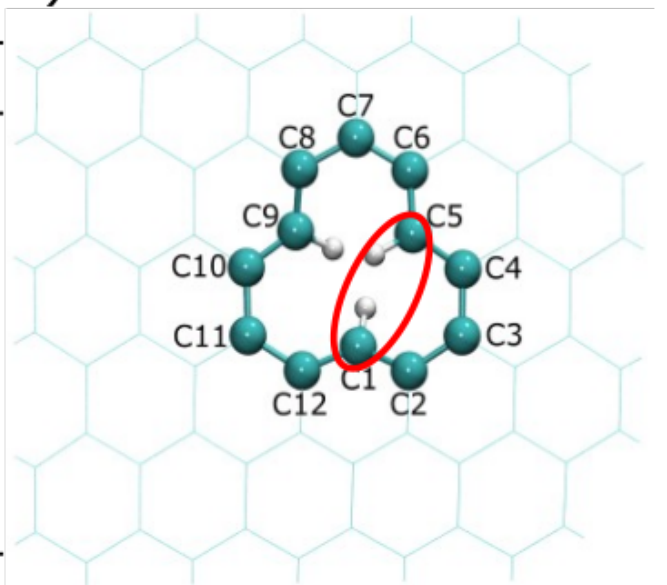

**Figure 10** Fukui Analysis reported with images showing the selected atoms for models (a, b) 1R and (c, d) 2R.



a)

| 3R Vacancy<br>External H | Local<br>Nucleophilicity | Local<br>Electrophilicity |
|--------------------------|--------------------------|---------------------------|
| C1                       | -14.48                   | -9.25                     |
| C2                       | -1.09                    | -0.59                     |
| C3                       | -0.83                    | -1.39                     |
| C4                       | 0.18                     | -1.16                     |
| C5                       | 7.77                     | -10.63                    |
| C6                       | 0.26                     | -0.06                     |
| C7                       | 6.77                     | -19.51                    |
| C8                       | -0.73                    | -1.33                     |
| C9                       | -14.86                   | -22.11                    |
| C10                      | 0.10                     | -1.56                     |
| C11                      | -17.17                   | -11.86                    |
| C12                      | 0.10                     | -0.59                     |

b)

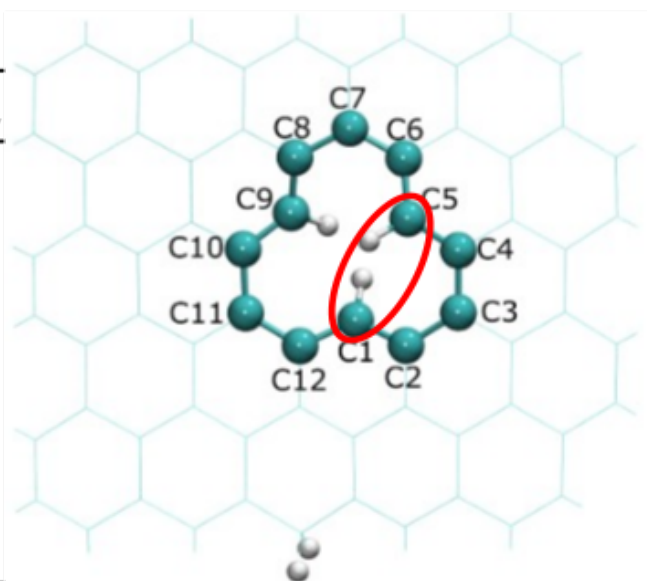

c)

| 4R Double<br>Vacancy | Local<br>Nucleophilicity | Local<br>Electrophilicity |
|----------------------|--------------------------|---------------------------|
| C1                   | -0,56                    | -3,59                     |
| C2                   | -0,27                    | -0,05                     |
| C3                   | -2,35                    | -6,06                     |
| C4                   | -0,50                    | -3,17                     |
| C5                   | -1,85                    | -6,16                     |
| C6                   | -2,26                    | -0,27                     |
| C7                   | -11,69                   | 0,16                      |
| C8                   | -1,50                    | -1,32                     |
| C9                   | -0,81                    | -2,00                     |
| C10                  | -1,32                    | -0,85                     |
| C11                  | -2,50                    | -0,10                     |
| C12                  | -4,05                    | -1,08                     |
| C13                  | -0,98                    | 0,08                      |
| C14                  | -0,35                    | -1,92                     |

d)

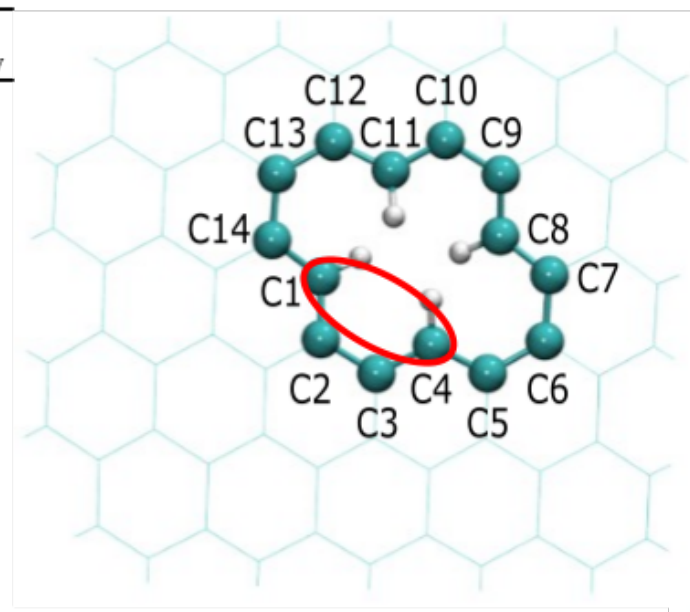

**Figure 11** Fukui Analysis reported with images showing the selected atoms for models (a, b) 3R and (c, d) 4R.

a)

| 5R Stone Wales Defect | Local Nucleophilicity | Local Electrophilicity |
|-----------------------|-----------------------|------------------------|
| C1                    | -3,13                 | -4,74                  |
| C2                    | -0,95                 | -1,01                  |
| C3                    | -0,72                 | -0,42                  |
| C4                    | -3,43                 | -2,13                  |
| C5                    | -3,43                 | -2,13                  |
| C6                    | -0,72                 | -0,42                  |
| C7                    | -7,12                 | -1,83                  |
| C8                    | -0,34                 | -0,28                  |
| C9                    | -3,53                 | -4,71                  |
| C10                   | -0,85                 | -1,20                  |

b)

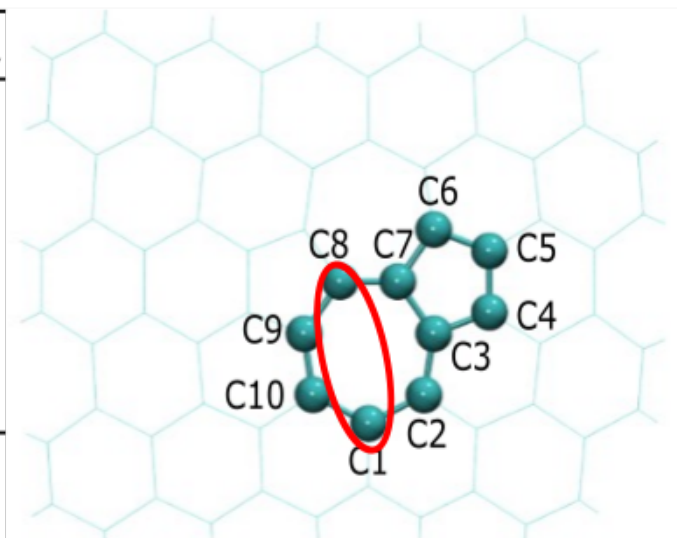

c)

| 6R Nitrogen Substitutional | Local Nucleophilicity | Local Electrophilicity |
|----------------------------|-----------------------|------------------------|
| N1                         | -4,22                 | -0,80                  |
| C2                         | -1,86                 | -2,42                  |
| C3                         | -0,39                 | -0,32                  |
| C4                         | -0,65                 | -0,52                  |
| C5                         | -2,68                 | -0,30                  |
| C6                         | -0,42                 | 0,05                   |
| C7                         | -2,29                 | -0,14                  |
| C8                         | 0,12                  | -1,12                  |
| C9                         | -0,85                 | -0,16                  |
| C10                        | -0,98                 | -2,40                  |
| C11                        | -1,36                 | -0,53                  |
| C12                        | -6,28                 | -0,05                  |
| C13                        | -1,16                 | -0,65                  |

d)

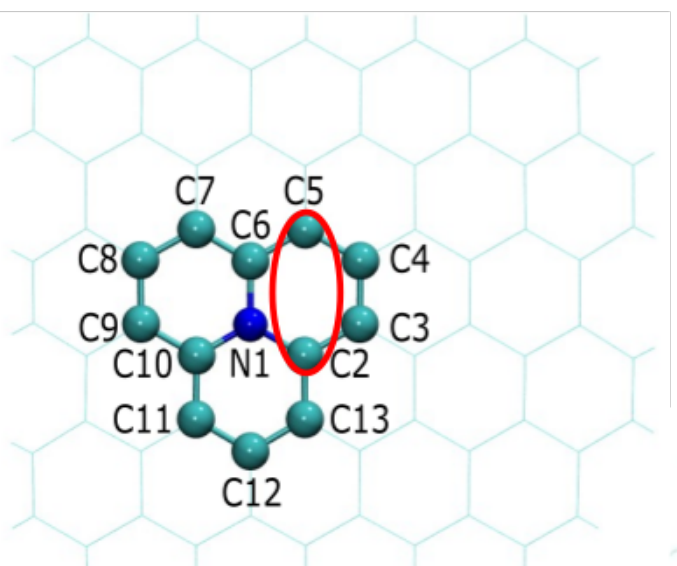

**Figure 12** Fukui Analysis reported with images showing the selected atoms for models (a, b) 5R and (c, d) 6R.

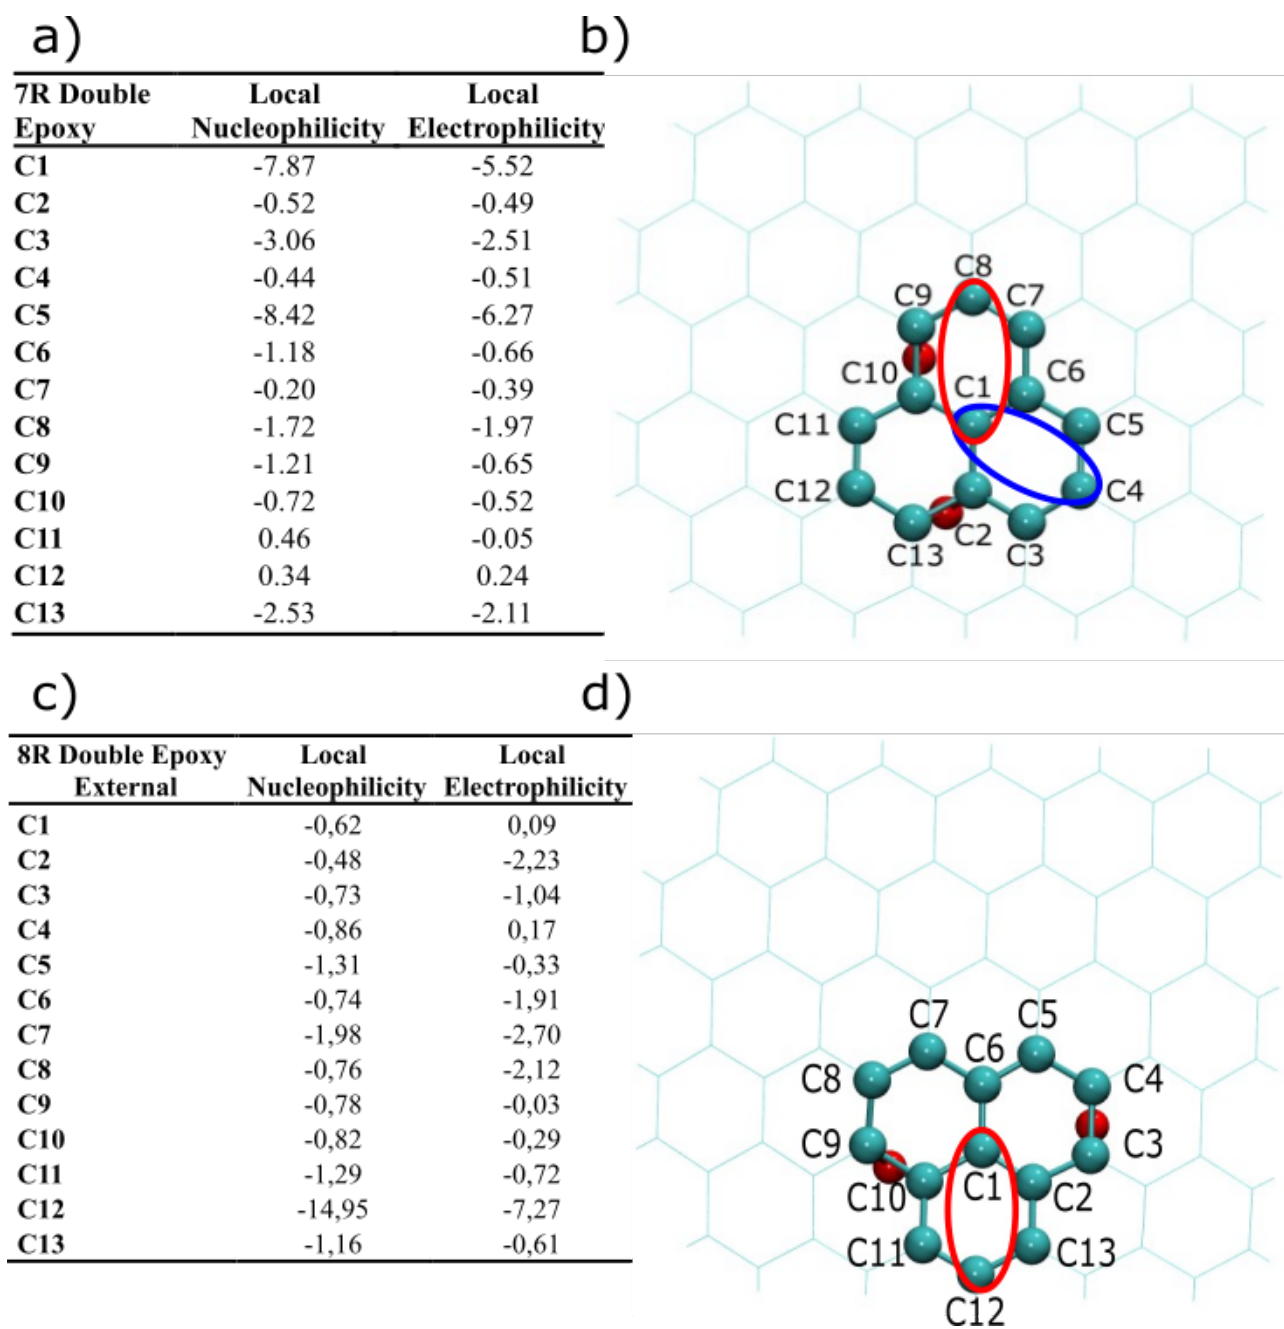

**Figure 13** Fukui Analysis reported with images showing the selected atoms for models (a, b) 7R and (c, d) 8R.

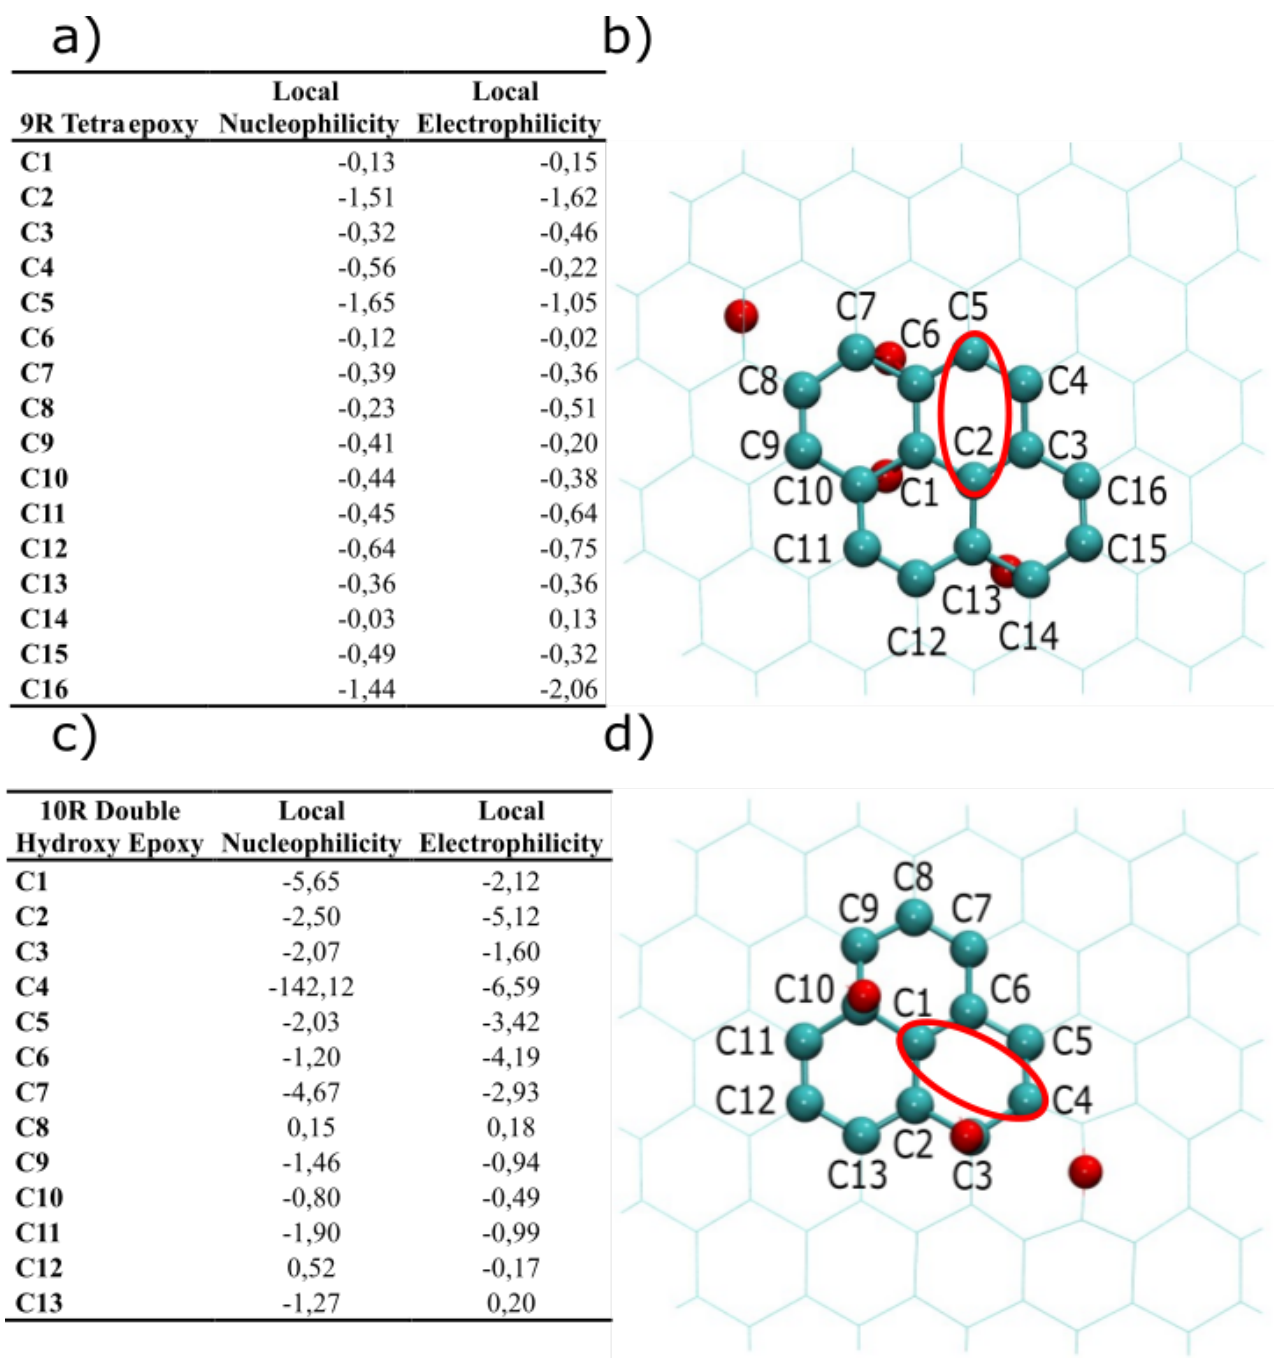

**Figure 14** Fukui Analysis reported with images showing the selected atoms for models (a, b) 9R and (c, d) 10R.
